# 1 **Inferring linguistic transmission between** 2 **generations at the scale of individuals**

3 Valentin Thouzeau<sup>†</sup>, Antonin Affholder<sup>†</sup>, Philippe Mennequier<sup>†</sup>, Paul Verdu<sup>†</sup>, Frédéric Austerlitz<sup>†</sup>

4 <sup>†</sup> *CNRS, MNHN, Université Paris Diderot, UMR 7206 Eco-Anthropologie et Ethnobiologie, Paris*  
5 *75016, France*

## 6 **Abstract**

7 Historical linguistics highly benefited from recent methodological advances inspired by  
8 phylogenetics. Nevertheless, no currently available method uses contemporaneous within-  
9 population linguistic diversity to reconstruct the history of human populations. Here, we develop an  
10 approach inspired from population genetics to perform historical linguistic inferences from  
11 linguistic data sampled at the individual scale, within a population. We built four demographic  
12 models of linguistic transmission at this scale, each model differing by the number of teachers  
13 involved during the language acquisition, and the relative roles of these teachers. We then compared  
14 the simulated data obtained with these models with real contemporaneous linguistic data sampled in  
15 Tajik speakers in Central Asia, an area known for its high within-population linguistic diversity,  
16 using approximate Bayesian computation methods. With these statistical methods, we were able to  
17 select the models that best explained the data, and inferred the best-fitting parameters under these  
18 selected models, demonstrating the feasibility of using contemporaneous within-population  
19 linguistic diversity to infer historical features of human cultural evolution.

## 20 **1. Introduction**

21 Several recent studies used linguistic data under a computational framework aiming at  
22 reconstructing various aspects of the cultural history of human populations (Atkinson, 2011;  
23 Bouckaert et al., 2012; Gray and Atkinson, 2002; Pagel et al., 2013). These data consist mainly of a  
24 set of presence or absence of items within a given set of contemporaneous languages, which can be  
25 found, for example, in databases such as the World Atlas of Language Structures WALS (Dryer and  
26 Haspelmath, 2013), or the Global Database of Cultural, Linguistic and Environmental Diversity D-  
27 PLACE (Kirby et al., 2016). Most studies consider languages at a macro-evolutionary scale, i.e.  
28 they deal only with differences among languages, neglecting the variability within each language.  
29 For instance, Gray and Atkinson (2002) used a set of Swadesh lists obtained for 87 languages to  
30 investigate the origin of the Indo-European linguistic family. Atkinson (2011) considered the  
31 number of phonemes used in 504 languages worldwide to test the hypothesis of a serial founder  
32 effect due to the Out-Of-Africa expansion. Reesink et al. (2009) used the linguistic diversity of the  
33 ancient Sahul continent (present day Australia, New Guinea, and surrounding islands) for 121  
34 languages to infer the history of the structural characteristics of these languages.

35 These approaches rely implicitly on several assumptions. They require primarily a clear  
36 separation between several differentiated languages. Nevertheless, this notion of distinct languages  
37 is often irrelevant at a local scale, in particular in contexts of dialectal continuum or linguistic  
38 contacts (Heeringa and Nerbonne, 2001; Livingstone and Fyfe, 1999). Furthermore, most of these  
39 studies do not take into account the within-population linguistic diversity, since traditional  
40 linguistics often considers languages as unique and coherent systems (Pateman, 1983).

41 This assumption implies the loss of a large amount of information, knowing that the  
42 demographic phenomena at population level – different population sizes, bottlenecks, expansions –

43 are expected to play a major role in language evolution (Vogt, 2009). Including contemporaneous  
44 within-population linguistic diversity in the reconstruction of the demographic history of human  
45 populations at a local scale should thus open a whole new dimension into the field of historical  
46 linguistic inferences.

47 In this context, Croft (1996) argued for a replacement of the ‘essentialist’ theory of language  
48 changes by a ‘population’ approach of language changes, and later proposed a detailed review of the  
49 “evolutionary linguistic” field and underlying paradigms (Croft, 2008). Nevertheless, very few  
50 studies deal with the contemporaneous within-population linguistic diversity in a historical  
51 reconstruction perspective. Some recent examples include the use of surnames in Austria as  
52 linguistic contemporaneous information (Rodriguez-Larralde and Barrai, 2000), the use of the  
53 family names in different contexts (Darlu et al., 2012), or the use of proportion of African words in  
54 free speech among Cape Verdean Kriolu speakers (Verdu et al., 2017).

55 In order to perform historical linguistic inferences from current linguistic data, we need to  
56 assume one or several possible model of linguistic transmission between generations, and a possible  
57 set of historical scenarios which produced these observed data. Nevertheless, there is no consensual  
58 theoretical framework allowing to handle within-population linguistic diversity data in order to infer  
59 the underlying historical scenarios and evolutionary mechanisms. It is possible to first assume a  
60 clear and delimited mechanism of linguistic evolution, and then to study the range of historical  
61 scenarios that could have produced the observed linguistic data. Nevertheless, the validity of the  
62 conclusions depends on the validity of the assumed mechanism. It is then crucial to determine the  
63 most relevant mechanism of linguistic evolution, in order to produce, ultimately, valid inferences.

64 We propose, in this article, to evaluate a series of models of linguistic evolution between  
65 generations at the individual scale. We did not study the history of higher-order objects such as “the  
66 languages”, but the history of the linguistic diversity carried by individuals within a population  
67 among which communication events may occur over time. We aimed here at understanding how the

68 evolution of linguistic diversity among generations is affected by demographic parameters such as  
69 population size (the number of individuals of a given speech community), and thus to assess  
70 whether it is possible to infer the best demographic scenario and its corresponding parameters from  
71 a set of linguistic data.

72 Approximate Bayesian Computation methods (ABC, Beaumont et al., 2002; Tavaré et al., 1997)  
73 provide a particularly well-adapted framework to tackle this problem. In this paper, we used the  
74 recently developed Approximate Bayesian Computation via Random Forest (ABCRF) algorithm to  
75 assess, among a set of possible competing scenarios, the scenario that best explains the observed  
76 data, and estimate the posterior parameters of this scenario (Breiman, 1999; Pudlo et al., 2016).

77 For this purpose, we implemented an individual-based simulation program, which simulates the  
78 evolution of linguistic items among generations, under different modes of linguistic transmission.  
79 These simulated data allowed us to perform the ABCRF procedure on a real dataset from Central  
80 Asia. This dataset consisted of 30 individuals interviewed for 185 words across 10 villages in  
81 Tajikistan. These villages are known to use the same language, but with some variability among  
82 individuals (Mennecier et al., 2016). We aimed at inferring the most probable models of linguistic  
83 transmission mechanisms between linguistic generations, under a demographic scenario of  
84 demographic expansion or contraction. We proposed four transmission models. The “Clonal model”  
85 assumes that each individual learns his/her linguistic items from only one teacher. The “Sexual  
86 model 1” assumes that each individual learns his/her linguistic items from two teachers (one male  
87 and one female), with specific items transmitted only by males and specific items transmitted only  
88 by females. The “Sexual model 2” assumes that each individual learns his/her linguistic items from  
89 two teachers (one male and one female), without specific items belonging to males or females.  
90 Finally, the “Social model” assumes that each individual learns his/her linguistic items from the  
91 whole population. We aimed then at inferring the best-fitting parameters under the chosen scenario:  
92 linguistic mutation rates, and populations sizes. Our aim was to demonstrate the feasibility of using

93 contemporaneous within-population linguistic diversity to infer historical features in human cultural  
94 evolution.

## 95 **2. Models**

### 96 **2.1. Production of utterances**

97 We considered a linguistic population as a group of individuals that may potentially interact  
98 through linguistic communication. The mechanisms of linguistic communication and transmission  
99 may follow different modalities, which correspond to different models of linguistic evolution.  
100 Nevertheless, we considered that the unit of linguistic communication is the *utterance*, a production  
101 of linguistic items associated with a meaning.

102 Each linguistic item is a possible version from a class. There are several types of linguistic items,  
103 which can be related to various aspects of languages: vocabulary, grammar, structure..., etc. We  
104 developed here a general model of linguistic item transmission, which we applied in particular to  
105 the case of cognates, which correspond to words with different etymological origins that express the  
106 same meaning. For example, the Spanish word “Flor” and French word “Fleur” are two items of the  
107 class Flower of the same meaning and the same etymological origin, and are then cognates. The  
108 Spanish word “Multa” and French word “Papillon” are two items of the class Butterfly with the  
109 same meaning, but with different etymological origin, and are then not cognates. We considered  
110 here that cognates can vary among individuals within a population. This differs from the  
111 assumptions made in previous studies (Bouckaert et al., 2012; Gray et al., 2009; Thouzeau et al.,  
112 2017) where cognates are sampled at the language scale and for which individuals are considered as  
113 users rather than producers of this language.

## 114           **2.2. Four models of acquisition of a new language**

115           We developed a new simulation software *PopLingSim 2 (PLS2)*. This software implements an  
116 individual-based forward-in-time simulation model with discrete generations, in which we assumed  
117 that populations were composed of only two types of individuals: “learners” and “teachers”. We  
118 assumed that the rules of utterance productions of a teacher depended only on the utterances that  
119 he/she heard when he/she was a learner. We assumed that each learner chose only one item from  
120 each class during the learning phase. Two learners could choose the same linguistic item. After the  
121 whole learning phase, each teacher was discarded and each learner became a teacher. Then, new  
122 learners appeared (exactly half male and half female in “*Sexual*” models, see blow).

123           We tested four models of linguistic acquisition during learning (Figure 1). These models differed  
124 by the number of teachers involved during the language acquisition, and the relative roles of these  
125 teachers.

126           In the first model, named the “*Clonal*” model, each learner had only one teacher, which was  
127 drawn at random in the teacher population. The learner copied “in a clonal way” every item that the  
128 teacher produced. In the second model, named the “*Sexual*” model, two different teachers (one  
129 “male” and one “female”) were attributed at random to each learner. The learner then copied  
130 directly the first half of the items produced by teacher 1, and the second half of the items produced  
131 by teacher 2. Thus, a determined half of the items was always transmitted by one teacher, and the  
132 other half by the other teacher. In the third model, named the “*Sexual2*” model, two different  
133 teachers (one “male” and one “female”) were attributed to each learner at random. For each item,  
134 the learner copied at random either the item from teacher 1 or teacher 2, with equal probabilities ( $\frac{1}{2}$ ,  
135  $\frac{1}{2}$ ). Thus, no particular item had a teacher-specific transmission, every item was transmitted from  
136 one teacher chosen at random. In the fourth model, named the “*Social*” model, for each class of  
137 meaning each learner copied an item drawn at random from all the items produced by all the  
138 teachers in the population.

139 For each model, we assumed that errors could occur during the transmission of each item,  
140 leading to the creation of a completely new item. We denoted such errors “linguistic mutations”.  
141 The mean mutation rate  $\bar{\mu}_L$  was drawn in a log-uniform prior distribution, between  $10^{-6}$  and  $10^{-1}$   
142 mutations per lexical item per generation. For each item, its mutation rate was subsequently drawn  
143 in a beta distribution with a mean  $\bar{\mu}_L$  and a shape  $\beta = 2$ , allowing us to simulate a set of linguistic  
144 items with a different rate of change.

### 145 **2.3. Historical scenario**

146 We focused here on a single linguistic population, defined as a language community, where the  
147 individuals have been sampled using a linguistic questionnaire. This linguistic population evolved  
148 first with a constant size  $N_0$  until  $t_0 = 5 \times N_0$ , a time that, as we visually checked, was sufficient to  
149 reach an equilibrium between the production of linguistic diversity through mutation, and the  
150 reduction of this diversity through random sampling. This population then evolved with a new size  
151  $N_1$  during  $t_1$  generations. The linguistic items were then sampled at the final generation. This model  
152 allowed simulating a range of histories, depending on the relative values of the parameters  $N_0$  and  
153  $N_1$  and on the value of  $t_1$ . The population sizes  $N_0$  and  $N_1$  were drawn in a uniform distribution  
154 between 100 and 1000 individuals, this low upper bound being set to limit the large computational  
155 time requirement for completing these forward-in-time simulations. Time  $t_1$  was drawn in a uniform  
156 distribution, between 0 and 1000 generations. The median, the minimum, the maximum, and the  
157 quantile 5% of the priors of the models are summarized in Table 1.

## 158 **3. Materials**

159 We sampled cognate variability for 30 individuals from 10 villages in Tajikistan (Figure 3)  
160 assuming that the individuals belonged to a single linguistic population. In contrast with our



161 previous study, where we considered for each cognate only its most frequent variant in each locality  
162 (Thouzeau et al., 2017), we kept here the linguistic variant recorded for each individual. Thus, for  
163 each individual, we recorded the words used for 185 meanings from an adapted Swadesh list. We  
164 considered as “cognate” a group of words with the same etymological origin and the same meaning,  
165 such words being more likely to be related by a common ancestry. The classification of lexical data  
166 gathered on the field into cognates was performed by Philippe Menecier following previous work  
167 (Menecier et al., 2016; Thouzeau et al., 2017).

## 168 **4. Analyses**

### 169 **4.1. Simulations**

170 For each model, we performed 10 000 simulations using our newly-developed software  
171 *PopLingSim 2 (PLS2)*. We parallelized the simulations using 250 cores of the cluster station  
172 *Genotoul*, amounting to approximately 90 000 CPU hours. Most of this computation time was spent  
173 during the phase to reach equilibrium between mutation and drift at  $t_0 = 5 \times N_0$  generations.

174 During the process of sampling linguistic items from our simulations, we simulated missing  
175 values by transforming cognates drawn at random into missing values. The total number of  
176 simulated missing values was set to the number of missing values in the real data set, to avoid the  
177 bias they may induce in the following ABC procedures.

### 178 **4.2. Summary statistics**

179 We constructed a new set of population linguistic summary statistics, some of which were  
180 inspired from classical population genetics statistics. After computing  $p_{i,j}$ , the proportion of

181 individuals using the item  $i$  of the class  $j$ , we computed the linguistic diversity  $D_j = 1 - \sum_i p_{ij}^2$ ,  
182 analogous to genetic diversity (Nei, 1987).

183 Then, we computed across all items:

- 184 - The mean linguistic diversity,  $\bar{D}$ ;
- 185 - The range of the linguistic diversity,  $R(D)$  ;
- 186 - The variance of the linguistic diversity,  $V(D)$  ;
- 187 - The number of strictly different lists of items,  $S$  ;
- 188 - The mean number of items in each class,  $\bar{N}$  ;
- 189 - The variance of the number of items in each class,  $V(N)$  ;
- 190 - The frequency spectrum of the number of items per class,  $F$ .

### 191 **4.3. Model selection**

192 Before model selection, we performed a goodness-of-fit test to check if the simulations were able  
193 to produce data close to the real data using the function *gfit* from the *R* package *abc* (Csilléry et al.,  
194 2012) to verify that we simulated datasets close to the real dataset. We performed model selection  
195 using the *R* package *abcrf* with the RF algorithm and the function *abcrf* (Pudlo et al., 2016). We  
196 graphically checked if a forest of 500 trees allowed a convergence of the error rate. We then  
197 performed a cross-validation analysis using an out-of-bag approach implemented in the package  
198 *abcrf*, evaluating if the algorithm was *a priori* able to distinguish between the four models.

### 199 **4.4. Parameters estimation**

200 We used the RF algorithm with the function *regAbcrf* of the package *abcrf* (Raynal et al., 2017)  
201 to estimate the expectation, the median, the variance and the quantiles 5% of the parameters  $N_1$ ,  $N_0$ ,  
202  $t_1$ ,  $\mu_L$  and the composite-parameters  $N_1 \times \mu_L$ ,  $N_0 \times \mu_L$  and  $t_1 \times \mu_L$ . Note that the RF algorithm does not  
203 estimate the whole posterior distribution of the parameters directly, but estimates the quantiles of  
204 this distribution instead.

## 205 5. Results

### 206 5.1. Model selection

207 Using the goodness-of-fit test, we verified that there was no significant differences between the  
208 real and simulated datasets (p-value = 0.55, with 1000 replications). We performed the RF analysis  
209 using 500 trees, and we verified graphically that the error rate converged. The RF analysis rejected  
210 the *Clonal* and the *Sexual* models, and selected with equal probability the *Sexual2* and the *Social*  
211 models (Table 2).

212 The cross-validation analysis (Figure 4) indicated a good *a priori* differentiation between the  
213 *Clonal* model, the *Sexual* model and the group ‘*Sexual2* and *Social*’ models. Nevertheless, the  
214 *Sexual2* and the *Social* models could not be reliably distinguished. It was therefore impossible to  
215 choose, based on our data, between the ‘*Sexual2*’ and the ‘*Social*’ models, but we may be confident  
216 in the rejection of the *Clonal* and the *Sexual* models.

### 217 5.2. Parameter estimation

218 For the two most likely models (*Sexual2* and *Social*), we could not estimate separately the  
219 parameters  $N_0$ ,  $N_1$  and  $t_1$ : the estimated quantiles of their posterior distributions were similar to those  
220 of their priors (Tables 3 and 4). Nevertheless, the estimated quantiles of the parameter  $\mu_L$  and of the  
221 composite parameters  $N_1 \times \mu_L$ ,  $N_0 \times \mu_L$  and  $t_1 \times \mu_L$ , were substantially narrower than those of their  
222 respective priors (Tables 3 and 4). Using the estimated posteriors for the *Sexual2* and *Social* models  
223 separately, we estimated that the linguistic mutation rate ranged between  $1.98 \times 10^{-4}$  and  $1.44 \times 10^{-3}$   
224 mutations per cognate per linguistic generation.

## 225 **6. Discussion**

226 In this article, we built individual-based models simulating the linguistic evolution of a  
227 population, under a given demographic scenario, considering four possible kinds of linguistic  
228 transmission between generations. We used an ABC framework to compare the simulated data with  
229 a real dataset of 30 individuals in Tajikistan typed for 185 cognates, in order to estimate which  
230 models fitted best the data and estimate the parameters of these best-fitting models.

231 First, we showed that some of our models were able to produce simulated data close to the  
232 contemporaneously observed data. It meant that we were able to implement linguistic transmission  
233 models between generations at the individual scale, which were consistent with the linguistic  
234 diversity of the sampled populations.

235 We provided thus inferences of some features of linguistic history, selecting the most plausible  
236 mechanisms of linguistic transmission, and estimating the parameters of the selected models for our  
237 sample of Tajik-speaking individuals. The low posterior probabilities of the *Clonal* and *Sexual*  
238 models compared to the *Sexual2* and the *Social* models indicated that the mechanisms of linguistic  
239 acquisition followed, in this case, a process of linguistic recombination with several teachers, and  
240 not a process of transmission without recombination among utterances from different teachers.

241 In other words, we inferred that these individuals did not learn their basic vocabulary from only  
242 one individual, or from two individuals with “male”-specific and “female”-specific lexical items.  
243 They seemed to learn their vocabulary either from two individuals without “sex”-specific  
244 vocabulary, or from the whole population. This is consistent with the fact that Tajik populations are  
245 known to be cognatic (Krader, 1966), i.e. they inherit social status and material goods from their  
246 two parents. This symmetric role of parents may imply that they receive also linguistic items from  
247 both of them. It would be of great interest in future work to distinguish between a transmission  
248 following a *Sexual2* model (with only two teachers), and a transmission following a *Social* model

249 (with a whole community as a teacher). This is likely to require a substantially larger amount of  
250 linguistic data at the within-population scale.

251 Our estimates of the mean linguistic mutation rate of the lexical items of the Swadesh list ranged  
252 between  $10^{-4}$  and  $10^{-3}$  mutations per lexical item per generation. Our micro-evolutionary context  
253 (i.e. at the scale of the individuals within a language) may be compared with a macro-evolutionary  
254 context (i.e. at the scale of a whole language or a linguistic variety). The mutation rate estimated  
255 here fell in the same range than the mutation rate in macro-evolutionary studies (Pagel et al., 2007).  
256 Considering that languages at a global scale emerge from the interactions among individuals, our  
257 result led us to hypothesise that the mutation rate estimated globally emerges from the mutation rate  
258 at a local scale.

259 Our posterior estimations of population sizes did not differ from the priors of the  
260 simulations. It meant that our method could not directly evaluate the number of individuals in the  
261 current and ancestral populations, but only synthetic parameters such as  $N_0\mu$ . Such limitation has  
262 been also observed in population genetics, where it is also quite difficult to estimate directly  
263 effective population sizes (Wang, 2005). In this context, one of the more promising approach might  
264 be to use temporal samples, as it was shown in population genetics that it was one of the most  
265 efficient method for estimating recent population size, and/or to design specific statistics (like for  
266 instance sibship frequencies in population genetics, Wang, 2016).

267 In this study, unlike most other studies focusing on within-population linguistic diversity (Baxter  
268 et al., 2009; Danescu-Niculescu-Mizil et al., 2013; Kandler et al., 2010), we only used  
269 contemporaneous linguistic diversity. This method allowed us to perform historical inferences only  
270 based on sampling campaigns conducted in existing populations. The amount of information  
271 available depends only on the sampling effort, and not on the relatively limited historical records.

272 There are nevertheless some theoretical obstacles remaining. First, the models of linguistic  
273 acquisition that we proposed here do not integrate the particular constraints of communication  
274 processes. In particular, we assumed a neutral production of variants without any constraints on  
275 linguistic communication. Some evolutionary linguists would argue for an integration of the  
276 particularity of languages as communication systems, associated with a strong set of constraints  
277 (Beckner et al., 2009). Indeed, individuals maximize the probability of being understood, as well as  
278 minimize the cost of communication, two features that will strongly affect linguistic evolutionary  
279 processes (Tamariz and Kirby, 2015). These constraints are particularly strong in the case of  
280 phonological, morphological, or syntactical systems, and we may wonder if lexical variants are  
281 subject to these constraints too. If so, these particularities of linguistic systems may be at odds with  
282 inferences based on a model of neutral evolution, and should thus be taken into account for an  
283 accurate model of linguistic evolution at the individual scale, for historical inferences purposes.

284 Moreover, we assumed that linguistic transmission occurs between generations, ignoring the  
285 impact of iterated communication between individuals of the same generation. Moreover, we did  
286 not take into account global media as books, radio, internet, or television. We should thus consider  
287 in future investigations several alternative models of language evolution, where the acquisition of  
288 language results from a series of interactions between individuals rather than from a unique  
289 transmission event.

290 Finally, note that the formalism of our models are close to the formalism of population genetics.  
291 This should allow proposing joint inferences coupling genetic and linguistic data for the same set of  
292 populations and individuals, but some theoretical limits remain. We may wonder whether a speech  
293 community (a “linguistic population”) is identical to a reproductive group (a “genetic population”).  
294 It is far from obvious that human reproductive boundaries overlap language boundaries among  
295 human groups. A joint model between genetics and linguistics should then request clarifying and

296 articulating rigorously the concepts of population genetics with the concepts of population  
297 linguistics to propose robust joint inferences.

## 298 **7. Acknowledgements**

299 We thank the Genotoul bioinformatics platform (Toulouse, Midi-Pyrenees) for providing help,  
300 computing and storage resources. V.T. was financed by a PhD grant from the French ‘Ministère de  
301 l’Education Nationale, de l’Enseignement Supérieur et de la Recherche’. V.T. and F.A. received a  
302 travel grant from the NEFREX project funded by the European Union (People Marie Curie Actions,  
303 International Research Staff Exchange Scheme, call FP7-PEOPLE-2012-IRISES). This work was  
304 also partially funded by the Agence Nationale de la Recherche grant DemoChips (ANR-12-BSV7-  
305 0012).

## 306 **8. Bibliography**

Atkinson, Q.D. (2011). Phonemic Diversity Supports a Serial Founder Effect Model of Language Expansion from Africa. *Science* 332, 346–349.

Baxter, G.J., Blythe, R.A., Croft, W., and McKane, A.J. (2009). Modeling language change: An evaluation of Trudgill’s theory of the emergence of New Zealand English. *Language Variation and Change* 21, 257.

Beaumont, M.A., Zhang, W., and Balding, D.J. (2002). Approximate Bayesian computation in population genetics. *Genetics* 162, 2025–2035.

Beckner, C., Blythe, R., Bybee, J., Christiansen, M.H., Croft, W., Ellis, N.C., Holland, J., Ke, J., Larsen-Freeman, D., and Schoenemann, T. (2009). Language is a complex adaptive system: Position paper. *Language Learning* 59, 1–26.

Bouckaert, R., Lemey, P., Dunn, M., Greenhill, S.J., Alekseyenko, A.V., Drummond, A.J., Gray, R.D., Suchard, M.A., and Atkinson, Q.D. (2012). Mapping the Origins and Expansion of the Indo-European Language Family. *Science* 337, 957–960.

- Breiman, L. (1999). Random forests. UC Berkeley TR567.
- Croft, W. (1996). Linguistic Selection: An Utterance-based Evolutionary Theory of Language Change. *Nordic Journal of Linguistics* 19, 99.
- Croft, W. (2008). Evolutionary Linguistics. *Annual Review of Anthropology* 37, 219–234.
- Csilléry, K., François, O., and Blum, M.G.B. (2012). abc: an R package for approximate Bayesian computation (ABC): *R package: abc*. *Methods in Ecology and Evolution* 3, 475–479.
- Danescu-Niculescu-Mizil, C., West, R., Jurafsky, D., Leskovec, J., and Potts, C. (2013). No country for old members: User lifecycle and linguistic change in online communities. In *Proceedings of the 22nd International Conference on World Wide Web, (ACM)*, pp. 307–318.
- Darlu, P., Bloothoof, G., Boattini, A., Brouwer, L., Brouwer, M., Brunet, G., Chareille, P., Cheshire, J., Coates, R., Dräger, K., et al. (2012). The Family Name as Socio-Cultural Feature and Genetic Metaphor: From Concepts to Methods. *Human Biology* 84, 169–214.
- Dryer, M.S., and Haspelmath, M. (2013). *The World Atlas of Language Structures Online* (Leipzig: Max Planck Institute for Evolutionary Anthropology).
- Gray, R.D., and Atkinson, Q.D. (2002). Language-tree divergence times support the Anatolian theory of Indo-European origin. *Geophysical Research Letters* 29.
- Gray, R.D., Drummond, A.J., and Greenhill, S.J. (2009). Language phylogenies reveal expansion pulses and pauses in Pacific settlement. *Science* 323, 479–483.
- Heeringa, W., and Nerbonne, J. (2001). Dialect areas and dialect continua. *Language Variation and Change* 13, 375–400.
- Kandler, A., Unger, R., and Steele, J. (2010). Language shift, bilingualism and the future of Britain’s Celtic languages. *Philosophical Transactions of the Royal Society B: Biological Sciences* 365, 3855–3864.
- Kirby, K.R., Gray, R.D., Greenhill, S.J., Jordan, F.M., Gomes-Ng, S., Bibiko, H.-J., Blasi, D.E., Botero, C.A., Bowern, C., Ember, C.R., et al. (2016). D-PLACE: A Global Database of Cultural, Linguistic and Environmental Diversity. *PLOS ONE* 11, e0158391.
- Krader, L. (1966). *Peoples of central Asia* (Indiana University [1966]).
- Livingstone, D., and Fyfe, C. (1999). Modelling the evolution of linguistic diversity. *Advances in Artificial Life* 704–708.
- Menecier, P., Nerbonne, J., Heyer, E., and Manni, F. (2016). A Central Asian Language Survey. *Language Dynamics and Change* 6, 57–98.
- Nei, M. (1987). *Molecular Evolutionary Genetics* (Columbia University Press).
- Pagel, M., Atkinson, Q.D., and Meade, A. (2007). Frequency of word-use predicts rates of lexical evolution throughout Indo-European history. *Nature* 449, 717–720.



- Pagel, M., Atkinson, Q.D., S. Calude, A., and Meade, A. (2013). Ultraconserved words point to deep language ancestry across Eurasia. *Proceedings of the National Academy of Sciences* 110, 8471–8476.
- Pateman, T. (1983). What is a language? *Language & Communication* 3, 101–127.
- Pudlo, P., Marin, J.-M., Estoup, A., Cornuet, J.-M., Gautier, M., and Robert, C.P. (2016). Reliable ABC model choice via random forests. *Bioinformatics* 32, 859–866.
- Raynal, L., Marin, J.-M., Pudlo, P., Ribatet, M., Robert, C.P., and Estoup, A. (2017). ABC random forests for Bayesian parameter inference. *Peer Community in Evolutionary Biology* 100036.
- Reesink, G., Singer, R., and Dunn, M. (2009). Explaining the Linguistic Diversity of Sahul Using Population Models. *PLOS Biology* 7, e1000241.
- Rodriguez-Larralde, and Barraï (2000). Elements of the surname structure of Austria. *Annals of Human Biology* 27, 607–622.
- Tamariz, M., and Kirby, S. (2015). Culture: Copying, Compression, and Conventionality. *Cognitive Science* 39, 171–183.
- Tavaré, S., Balding, D.J., Griffiths, R.C., and Donnelly, P. (1997). Inferring Coalescence Times from DNA Sequence Data. *Genetics* 145, 505–518.
- Thouzeau, V., Menecier, P., Verdu, P., and Austerlitz, F. (2017). Genetic and linguistic histories in Central Asia inferred using approximate Bayesian computations. *Proc. R. Soc. B* 284, 20170706.
- Verdu, P., Jewett, E.M., Pemberton, T.J., Rosenberg, N.A., and Baptista, M. (2017). Parallel Trajectories of Genetic and Linguistic Admixture in a Genetically Admixed Creole Population. *Current Biology* 27, 2529-2535.e3.
- Vogt, P. (2009). Modeling interactions between language evolution and demography. *Human Biology* 81, 237–258.
- Wang, J. (2005). Estimation of effective population sizes from data on genetic markers. *Philosophical Transactions of the Royal Society of London B: Biological Sciences* 360, 1395–1409.
- Wang, J. (2016). A comparison of single-sample estimators of effective population sizes from genetic marker data. *Mol. Ecol.* 25, 4692–4711.

|                    | <b>Median</b>          | <b>Min</b> | <b>Max</b> | <b>Quantile<br/>2.5%</b> | <b>Quantile<br/>97.5%</b> |
|--------------------|------------------------|------------|------------|--------------------------|---------------------------|
| $N_0$              | 550                    | 100        | 1000       | 122                      | 978                       |
| $N_1$              | 550                    | 100        | 1000       | 122                      | 978                       |
| $t_1$              | 500                    | 0          | 1000       | 25                       | 975                       |
| $\mu_L$            | $3.165 \times 10^{-4}$ | $10^{-6}$  | $10^{-1}$  | $1.35 \times 10^{-6}$    | $7.73 \times 10^{-2}$     |
| $N_0 \times \mu_L$ | 0.150                  | $10^{-4}$  | 100        | $5.25 \times 10^{-4}$    | 44.5                      |
| $N_1 \times \mu_L$ | 0.150                  | $10^{-4}$  | 100        | $5.25 \times 10^{-4}$    | 44.5                      |
| $t_1 \times \mu_L$ | 0.116                  | 0          | 100        | $2.80 \times 10^{-4}$    | 42.0                      |

**Table 1** – Summary of the prior distributions of the parameters for the four models.

| <b>Clonal</b> | <b>Sexual</b> | <b>Sexual2</b> | <b>Social</b> |
|---------------|---------------|----------------|---------------|
| 0.002         | 0.04          | 0.478          | 0.48          |

**Table 2** – Proportion of votes for the four models of linguistic evolution.

|                    | <b>Expectation</b>    | <b>Median</b>         | <b>Variance</b>       | <b>Quantile 2.5%</b>   | <b>Quantile 97.5%</b> |
|--------------------|-----------------------|-----------------------|-----------------------|------------------------|-----------------------|
| $N_0$              | 526                   | 499                   | 43331                 | 126                    | 968                   |
| $N_1$              | 645                   | 714                   | 65762                 | 154                    | 975                   |
| $t_0$              | 479                   | 466                   | 87448                 | 21                     | 937                   |
| $\mu_L$            | $4.66 \times 10^{-4}$ | $3.23 \times 10^{-4}$ | $1.13 \times 10^{-7}$ | $2.18 \times 10^{-4}$  | $1.44 \times 10^{-3}$ |
| $N_0 \times \mu_L$ | 0.243                 | 0.193                 | 0.039                 | 0.057                  | 0.87                  |
| $N_1 \times \mu_L$ | 0.255                 | 0.244                 | $4.10 \times 10^{-3}$ | 0.15                   | 0.467                 |
| $t_1 \times \mu_L$ | 0.239                 | 0.177                 | 0.064                 | $8.092 \times 10^{-3}$ | 1.152                 |

**Table 3** – Summary of the posterior distributions of the parameters, assuming a *Sexual2* scenario.

|                    | <b>Expectation</b>    | <b>Median</b>         | <b>Variance</b>       | <b>Quantile 2.5%</b>  | <b>Quantile 97.5%</b> |
|--------------------|-----------------------|-----------------------|-----------------------|-----------------------|-----------------------|
| $N_0$              | 544                   | 542                   | 60108                 | 153                   | 986                   |
| $N_1$              | 655                   | 681                   | 61907                 | 148                   | 966                   |
| $t_0$              | 353                   | 290                   | 109196                | 9                     | 954                   |
| $\mu_L$            | $4.26 \times 10^{-4}$ | $3.14 \times 10^{-4}$ | $1.03 \times 10^{-7}$ | $1.98 \times 10^{-4}$ | $1.28 \times 10^{-3}$ |
| $N_0 \times \mu_L$ | 0.203                 | 0.175                 | 0.028                 | 0.074                 | 0.553                 |
| $N_1 \times \mu_L$ | 0.255                 | 0.246                 | $4.85 \times 10^{-3}$ | 0.122                 | 0.432                 |
| $t_1 \times \mu_L$ | 0.204                 | 0.126                 | 0.098                 | $5.33 \times 10^{-3}$ | 1.09                  |

**Table 4** – Summary of the posterior distributions of the parameters, assuming a *Social* scenario.

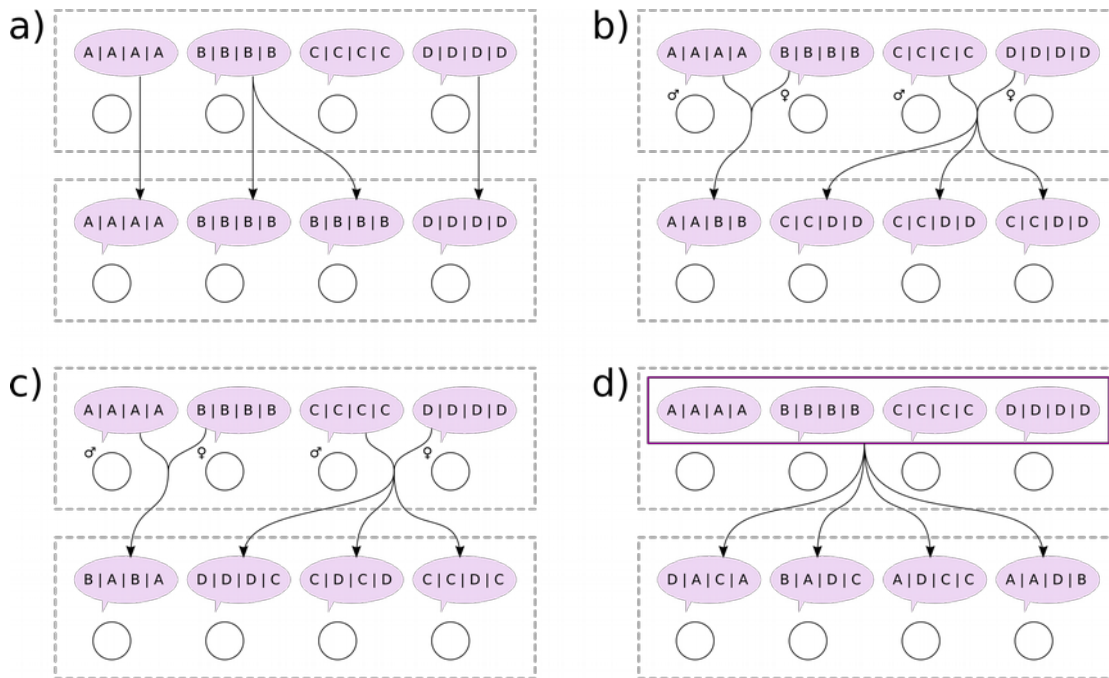

**Figure 1** – Four models of linguistic transmission between generations. Each circle represents an individual. The utterances that individuals produce depend only on the utterances that their teachers produced at the previous generation, and on the mutations induced during the transmission. Four transmission modalities were considered: (a) a “Clonal” model with only one teacher per learner, (b) a “Sexual” model with two teachers associated with a distinct set of vocabulary for each sex, (c) a “Sexual2” model with two teachers without a distinct set of vocabulary for each sex, and (d) a “Social” model with the whole population as teacher for each learner.

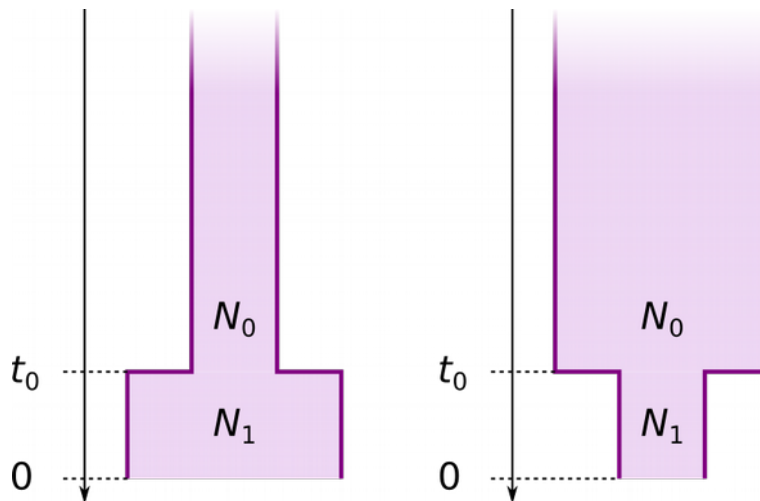

**Figure 2** – Historical scenario. Its structure depends on the relative values of the parameters  $N_0$  and  $N_1$ . If  $N_0 = N_1$ , we assumed a scenario of constant population size. If  $N_0 < N_1$ , we assume a scenario of expansion of the population. If  $N_0 > N_1$ , we assume a scenario of contraction of the population.

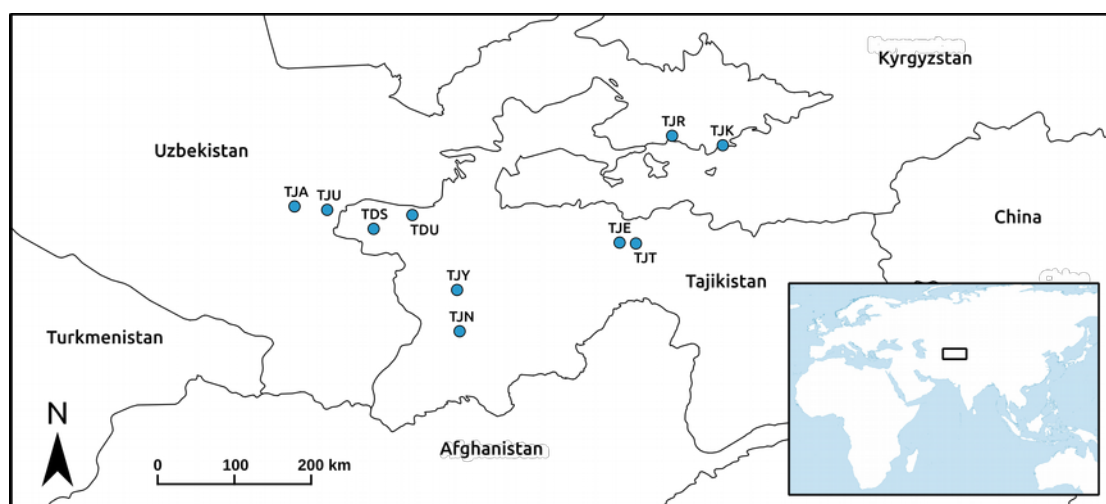

**Figure 3** – Geographical distribution of the 10 sampled units under study.

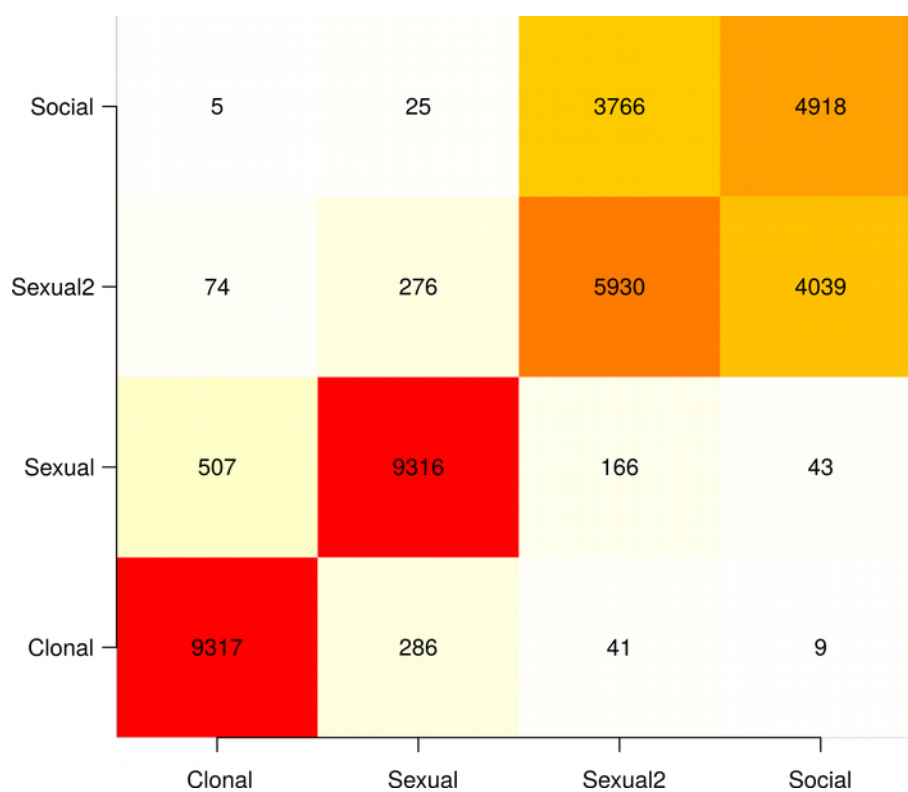

**Figure 4** – Confusion matrices from the out-of-bag cross-validation analysis of the four models, using 10 000 pseudo-observed data.
